# Supplementary material
Source: PubMed Central journal article supplement (PMC8329266)
Supplement: plantbiotechnology-38-2-21.0121a-s002.pdf [file plantbiotechnology-38-2-21.0121a-s002.pdf]

Bera et al.  
Supplementary Figure S2

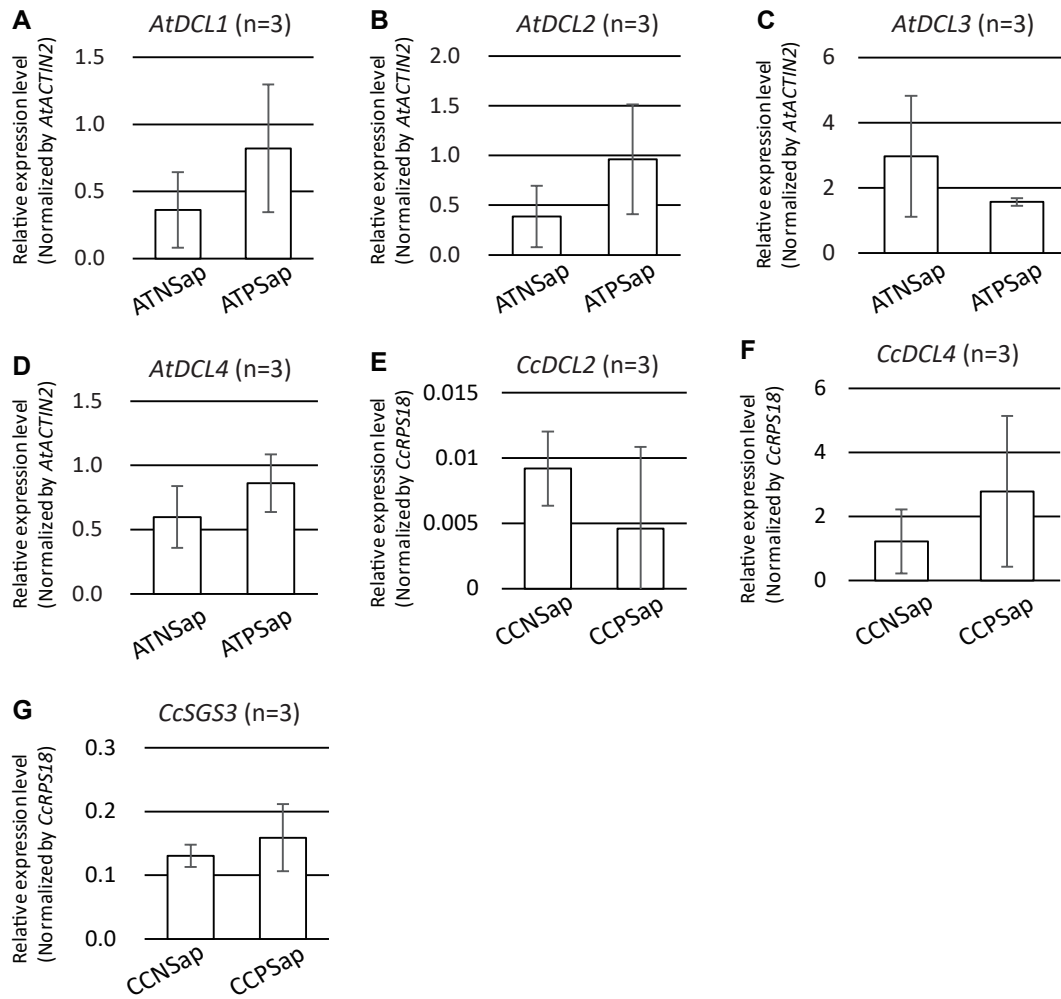

**Supplementary Figure S2.** Response of sRNA biogenesis-related genes to the parasitism in Cc-At parasitic complex, which did not show significant change. Expression levels of (A) *AtDCL1*, (B) *AtDCL2*, (C) *AtDCL3*, (D) *AtDCL4*, (E) *CcDCL2*, (F) *CcDCL4*, (G) *CcSGS3* were compared between nonparasitic and parasitic stems. ATNSap, apical region of nonparasitic stem of *Arabidopsis thaliana*; ATPSap, apical region of parasitic stem of *A. thaliana*; CCNSap, nonparasitic stem of *Cuscuta campestris* containing apical region; CCPSap, parasitic stem of *Cuscuta campestris* containing apical region. There were no significant difference, as examined by the Student's t-test ( $p < 0.05$ ).
